# Supplementary material for: Social cognition remediation interventions: A systematic mapping review
Source: PubMed Central journal article supplement (PMC6594616; doi:10.1371/journal.pone.0218720), 2019-06-26
Supplement: pone.0218720.s001.pdf [file pone.0218720.s001.pdf]

## S1: Template for a Mapping Study Protocol

| Section                   | Recommendation                                                                                                                                                                | Line #                        |
|---------------------------|-------------------------------------------------------------------------------------------------------------------------------------------------------------------------------|-------------------------------|
| <b>1. Change Record</b>   |                                                                                                                                                                               |                               |
|                           | This should be a list or table summarizing the main updates and changes embodied in each version of the protocol and (where appropriate), the reasons for these.              | N/A                           |
| <b>2. Background</b>      |                                                                                                                                                                               |                               |
|                           | a) explain why there is a need for a study on this topic                                                                                                                      | 86-91                         |
|                           | b) identify the topic that is to be 'scoped' in the study                                                                                                                     | 70-72                         |
|                           | c) specify any research questions that will be addressed                                                                                                                      | 107-109; 117-118;<br>127; 150 |
|                           | d) if extending previous research on the topic, explain why a new study is needed                                                                                             | N/A                           |
| <b>3. Search Strategy</b> |                                                                                                                                                                               |                               |
|                           | a) specify and justify basic strategy: manual search, automated search, or mixed                                                                                              | 172-175                       |
|                           | b) for automated searches, specify search terms and compounds of these (and record results of any prototyping of the search strings)                                          | 176-190                       |
|                           | c) for automated searches, identify resources to be used (digital libraries and search engines)                                                                               | 172-175                       |
|                           | d) for manual searches, identify the journals and conferences to be searched                                                                                                  | N/A                           |
|                           | e) specify the time period to be covered by the review and any reasons for your choice                                                                                        | 195                           |
|                           | f) identify any ancillary search procedures, e.g. asking leading researchers or research groups, or accessing their web sites; or checking reference lists of primary studies | 233-240                       |
|                           | g) specify how the search process is to be evaluated (e.g. against a known subset of papers; or against the results from a previous systematic review or mapping study)       | 233-240                       |

| <b>Section</b>               | <b>Recommendation</b>                                                                                                                                               | <b>Line #</b>             |
|------------------------------|---------------------------------------------------------------------------------------------------------------------------------------------------------------------|---------------------------|
| <b>4. Selection Criteria</b> |                                                                                                                                                                     |                           |
|                              | a) identify the <i>inclusion</i> criteria for primary studies                                                                                                       | <b>193-196; 208-214</b>   |
|                              | b) identify the <i>exclusion</i> criteria                                                                                                                           | <b>197-207; 215-218</b>   |
|                              | c) define how selection will be undertaken (roles of analysts)                                                                                                      | <b>168-171</b>            |
|                              | d) define how agreement among analysts will be evaluated                                                                                                            | <b>221-237</b>            |
|                              | e) define how any differences between analysts will be resolved                                                                                                     | <b>221-237</b>            |
| <b>5. Data Extraction</b>    |                                                                                                                                                                     |                           |
|                              | a) design data extraction form (and check via a dry run)                                                                                                            | <b>176-181</b>            |
|                              | b) specify the strategy for extracting the data and the form (paper, on-line etc.)                                                                                  | <b>176-181</b>            |
|                              | c) identify how the data extraction process is to be undertaken and validated, particularly any data that require numerical calculations, or are subjective         | <b>N/A</b>                |
| <b>6. Synthesis</b>          |                                                                                                                                                                     |                           |
|                              | a) specify the categorization schemes to be used                                                                                                                    | <b>281; 287; 312; 328</b> |
|                              | b) assess the threats to validity (construct, internal, external), particularly constraints on the search process and deviations from standard practice             | <b>422-433</b>            |
| <b>7. Study Limitations</b>  |                                                                                                                                                                     |                           |
|                              | Specify residual validity issues including potential conflicts of interest (i.e. that are inherent in the context of the study, rather than arising from the plan). | <b>426-438</b>            |
| <b>8. Reporting</b>          |                                                                                                                                                                     |                           |
|                              | Identify target audience, relationship to other studies, planned publications, authors of the publications.                                                         | <b>407-425</b>            |
| <b>9. Schedule</b>           |                                                                                                                                                                     |                           |
|                              | Provide time estimates for all of the major steps.                                                                                                                  | <b>N/A</b>                |
