# Supplementary material for: Social cognition remediation interventions: A systematic mapping review
Source: PubMed Central journal article supplement (PMC6594616; doi:10.1371/journal.pone.0218720), 2019-06-26
Supplement: pone.0218720.s002.pdf [file pone.0218720.s002.pdf]

### S3: Publication venues

| Publication                                   | Ref                                                                                                     | # ref | Publication                                          | Ref  | # ref | Publication                                                    | Ref  | # ref |
|-----------------------------------------------|---------------------------------------------------------------------------------------------------------|-------|------------------------------------------------------|------|-------|----------------------------------------------------------------|------|-------|
| Schizophrenia Research                        | P45, P46, P47, P48, P59, P61, P63, P64, P86, P102, P103, P109, P121, P132, P140, P181, P189, P191, P226 | 19    | Biological Psychiatry                                | P73  | 1     | Journal of Positive Behavior Interventions                     | P69  | 1     |
| Journal of Autism and Developmental Disorders | P11, P12, P18, P81, P107, P124, P125, P208, P216, P219                                                  | 10    | BMC Research Notes                                   | P193 | 1     | Journal of Psychiatric and Mental Health Nursing               | P232 | 1     |
| Psychiatry Research                           | P16, P40, P65, P70, P172, P179, P209, P230                                                              | 8     | Body, Movement and Dance in Psychotherapy            | P205 | 1     | Journal of Psychiatric Research                                | P104 | 1     |
| Behavioural and Cognitive Psychotherapy       | P178, P180, P211, P222, P224, P228, P229                                                                | 7     | British Journal of Educational Psychology            | P21  | 1     | Journal of Research in Character Education                     | P54  | 1     |
| PLoS ONE                                      | P68, P129, P142, P163, P203, P207                                                                       | 6     | Child and Family Behavior Therapy                    | P233 | 1     | Journal of School Violence                                     | P75  | 1     |
| Schizophrenia Bulletin                        | P122, P136, P143, P148, P237                                                                            | 5     | Child Development                                    | P118 | 1     | Journal of Special Education and Rehabilitation                | P1   | 1     |
| BMC Psychiatry                                | P6, P133, P185, P212                                                                                    | 4     | Chinese Mental Health Journal                        | P240 | 1     | Journal of the International Neuropsychological Society        | P170 | 1     |
| Developmental Psychology                      | P20, P82, P127, P234                                                                                    | 4     | Clinical Case Studies                                | P51  | 1     | Journal of the Society for Social Work and Research            | P66  | 1     |
| Autism                                        | P13, P52, P116                                                                                          | 3     | Clinical Practice and Epidemiology in Mental Health  | P227 | 1     | Memory and Cognition                                           | P29  | 1     |
| Behaviour Research and Therapy                | P72, P176, P184                                                                                         | 3     | Clinical Psychology and Psychotherapy                | P152 | 1     | Molecular Autism                                               | P198 | 1     |
| Clinical Neuropsychiatry                      | P32, P39, P164                                                                                          | 3     | Cognition                                            | P195 | 1     | Nervenheilkunde                                                | P238 | 1     |
| Clinical Schizophrenia and Related Psychoses  | P83, P84, P192                                                                                          | 3     | Cognitive Behaviour Therapy                          | P149 | 1     | NeuroImage: Clinical                                           | P165 | 1     |
| Frontiers in Psychiatry                       | P79, P112, P161                                                                                         | 3     | Cognitive Neuropsychiatry                            | P31  | 1     | Neurology                                                      | P157 | 1     |
| Frontiers in Psychology                       | P28, P38, P221                                                                                          | 3     | Community Mental Health Journal                      | P44  | 1     | Neuropsychiatric Disease and Treatment                         | P93  | 1     |
| Journal of Clinical Psychology                | P9, P57, P98                                                                                            | 3     | Development and Psychopathology                      | P88  | 1     | Neuropsychiatrie de l'Enfance et de l'Adolescence              | P8   | 1     |
| Journal of Experimental Child Psychology      | P22, P119, P150                                                                                         | 3     | Early Child Development and Care                     | P78  | 1     | Neuropsychiatry                                                | P23  | 1     |
| Journal of Head Trauma Rehabilitation         | P76, P145, P171                                                                                         | 3     | Early Education and Development                      | P3   | 1     | Neuropsychologia                                               | P53  | 1     |
| Neuropsychological Rehabilitation             | P17, P108, P138                                                                                         | 3     | Early Intervention in Psychiatry                     | P10  | 1     | Journal of Deaf Studies and Deaf Education                     | P218 | 1     |
| Psychiatric Services                          | P60, P94, P100                                                                                          | 3     | Estudos de Psicologia                                | P182 | 1     | NPJ Schizophrenia                                              | P158 | 1     |
| Psychological Medicine                        | P15, P67, P196                                                                                          | 3     | European Child and Adolescent Psychiatry             | P7   | 1     | Patient Education and Counseling                               | P25  | 1     |
| Schizophrenia Research: Cognition             | P144, P159, P225                                                                                        | 3     | European Journal of Developmental Psychology         | P91  | 1     | Progress in Neuro-Psychopharmacology and Biological Psychiatry | P113 | 1     |
| Australasian Psychiatry                       | P130, P153                                                                                              | 2     | First Language                                       | P210 | 1     | Psychiatry Research - Neuroimaging                             | P101 | 1     |
| British Journal of Clinical Psychology        | P177, P188                                                                                              | 2     | Focus on Autism and Other Developmental Disabilities | P215 | 1     | PsychNology Journal                                            | P5   | 1     |
| British Journal of Psychiatry                 | P26, P156                                                                                               | 2     | Frontiers in Human Neuroscience                      | P162 | 1     | Psychological Research                                         | P200 | 1     |
| Chinese Journal of Clinical Psychology        | P168, P239                                                                                              | 2     | Infancia y Aprendizaje                               | P187 | 1     | Psychological Science                                          | P58  | 1     |
| Cognitive Development                         | P87, P217                                                                                               | 2     | Infancy                                              | P90  | 1     | Psychologie Française                                          | P37  | 1     |

|                                                                    |            |   |                                                            |      |   |                                                             |      |   |
|--------------------------------------------------------------------|------------|---|------------------------------------------------------------|------|---|-------------------------------------------------------------|------|---|
| Computers in Human Behavior                                        | P41, P56   | 2 | Infant Mental Health Journal                               | P194 | 1 | Psychology and Psychotherapy                                | P220 | 1 |
| Journal of Affective Disorders                                     | P36, P117  | 2 | International Journal of High Risk Behaviors and Addiction | P146 | 1 | Psychology in the Schools                                   | P214 | 1 |
| Journal of Behavior Therapy and Experimental Psychiatry            | P80, P147  | 2 | International Journal of Psychology and Psych. Therapy     | P74  | 1 | Psychosis                                                   | P206 | 1 |
| Journal of Cognition and Development                               | P89, P105  | 2 | International Journal of Rehabilitation Research           | P174 | 1 | Psychotherapy                                               | P55  | 1 |
| Journal of the American Academy of Child and Adolescent Psychiatry | P77, P201  | 2 | International Journal of Telerehabilitation                | P236 | 1 | Psychotherapy and Psychosomatics                            | P114 | 1 |
| Personality and Individual Differences                             | P97, P166  | 2 | Iranian Journal of Child Neurology                         | P2   | 1 | Remedial and Special Education                              | P115 | 1 |
| Psicothema                                                         | P35, P134  | 2 | Iranian Journal of Psychiatry and Clinical Psychology      | P110 | 1 | Revista de Logopedia, Foniatría y Audiología                | P197 | 1 |
| Psychiatric Rehabilitation Journal                                 | P30, P71   | 2 | Journal de Therapie Comportementale et Cognitive           | P14  | 1 | Revista de Psicologia Social                                | P96  | 1 |
| Rehabilitacion Psicosocial                                         | P4, P173   | 2 | Journal for Specialists in Group Work                      | P223 | 1 | Revista de Psiquiatria Clinica                              | P202 | 1 |
| Research in Autism Spectrum Disorders                              | P123, P155 | 2 | Journal of Abnormal Psychology                             | P160 | 1 | Science                                                     | P111 | 1 |
| Social Development                                                 | P151, P169 | 2 | Journal of Attention Disorders                             | P43  | 1 | Shanghai Archives of Psychiatry                             | P34  | 1 |
| Social Neuroscience                                                | P92, P128  | 2 | Journal of Child Psychology and Psychiatry and All. Disc.  | P235 | 1 | Social Cognitive and Affective Neuroscience                 | P135 | 1 |
| Aging and Mental Health                                            | P186       | 1 | Journal of Clinical & Adolescent Psychology                | P213 | 1 | Spanish Journal of Psychology                               | P85  | 1 |
| American Journal of Psychiatric Rehabilitation                     | P131       | 1 | Journal of Consulting and Clinical Psychology              | P106 | 1 | Sport Psychologist                                          | P154 | 1 |
| Applied Neuropsychology                                            | P137       | 1 | Journal of Contemporary Psychotherapy                      | P33  | 1 | Therapeutic Recreation Journal                              | P49  | 1 |
| Archives of General Psychiatry                                     | P62        | 1 | Journal of Developmental and Physical Disabilities         | P183 | 1 | Topics in Language Disorders                                | P50  | 1 |
| Archives of Gerontology and Geriatrics                             | P120       | 1 | Journal of Experimental Psychology: General                | P42  | 1 | Trials                                                      | P99  | 1 |
| Art Therapy                                                        | P175       | 1 | Journal of Family Psychology                               | P167 | 1 | Work                                                        | P126 | 1 |
| Autism Research                                                    | P19        | 1 | Journal of Forensic Psychiatry and Psychology              | P231 | 1 | World Health                                                | P241 | 1 |
| Behavior Therapy                                                   | P95        | 1 | Journal of Health Psychology                               | P141 | 1 | World Journal of Biological Psychiatry                      | P204 | 1 |
| Behavioral and Brain Functions                                     | P139       | 1 | Journal of Nonverbal Behavior                              | P190 | 1 | Zeitschrift fur Psychiatrie, Psychologie und Psychotherapie | P24  | 1 |
| Behavioral Neuroscience                                            | P27        | 1 | Journal of Intellectual Disability Research                | P199 | 1 |                                                             |      |   |
