# Supplementary material for: Social cognition remediation interventions: A systematic mapping review
Source: PubMed Central journal article supplement (PMC6594616; doi:10.1371/journal.pone.0218720), 2019-06-26
Supplement: pone.0218720.s003.pdf [file pone.0218720.s003.pdf]

## S4: Cognitive Rehabilitation Programs

| <b>Targeted Interventions</b>                                                                     |                                                                                                                                                                          |             |
|---------------------------------------------------------------------------------------------------|--------------------------------------------------------------------------------------------------------------------------------------------------------------------------|-------------|
| <b>Named Intervention Program</b>                                                                 | <b>Ref</b>                                                                                                                                                               | <b>#ref</b> |
| Social Cognition and Interaction Training (SCIT)                                                  | P10, P40, P45, P47, P94, P117, P153, P177, P179, P180, P228, P230                                                                                                        | 12          |
| Training of Affect Recognition (TAR)                                                              | P59, P92, P128, P191, P204, P237, P238                                                                                                                                   | 7           |
| Conversation-Based Intervention                                                                   | P21, P22, P38, P118, P119, P120, P186                                                                                                                                    | 7           |
| Mind Reading                                                                                      | P88, P115, P116, P215, P216, P233                                                                                                                                        | 6           |
| summerMAX                                                                                         | P123, P124, P125, P183, P213, P214                                                                                                                                       | 6           |
| Mentalization-Based Therapy (MBT)                                                                 | P32, P221, P231, P232                                                                                                                                                    | 4           |
| Micro-Expression Training Tool (METT)                                                             | P131, P132, P188, P189                                                                                                                                                   | 4           |
| The Theory of Mind Training                                                                       | P18, P19, P81, P99                                                                                                                                                       | 4           |
| Metacognitive Reflective and Insight Therapy (MERIT)                                              | P33, P96, P98                                                                                                                                                            | 3           |
| Metacognitive Training (MCT)                                                                      | P80, P170, P220                                                                                                                                                          | 3           |
| Social Cognitive Skills Training (SCST)                                                           | P86, P103, P104                                                                                                                                                          | 3           |
| Social Cognitive Training Program (PECS)                                                          | P83, P84, P85                                                                                                                                                            | 3           |
| Attentional Shaping Program                                                                       | P46, P48                                                                                                                                                                 | 2           |
| Cognitive Remediation and Emotion Skills Training (CREST)                                         | P141, P212                                                                                                                                                               | 2           |
| Cognitive Remediation of Theory of Mind (ToMRemed)                                                | P14, P108                                                                                                                                                                | 2           |
| Emotion and ToM Imitation Training (ETIT)                                                         | P138, P164                                                                                                                                                               | 2           |
| Frankfurt Test and Training of Facial Affect Recognition (FEFA)                                   | P26, P27                                                                                                                                                                 | 2           |
| Mental-State Reasoning Training for Social Cognitive Impairment (SoCog-MSRT)                      | P130, P133                                                                                                                                                               | 2           |
| Metacognitive and Social Cognitive Skills Program (MSCT)                                          | P181, P182                                                                                                                                                               | 2           |
| Online Social Cognitive Program "SocialVille"                                                     | P144, P185                                                                                                                                                               | 2           |
| RC2S (Remédiation Cognitive de la Cognition Sociale) Program                                      | P161, P162                                                                                                                                                               | 2           |
| Social Cognition and Interaction Training Modified for High Functioning Autism (SCIT-A)           | P126, P219                                                                                                                                                               | 2           |
| Theory of Mind Intervention (ToMI)                                                                | P15, P17                                                                                                                                                                 | 2           |
| Augmented Reality-based Video-Modeling with Storybook (ARVMS)                                     | P41                                                                                                                                                                      | 1           |
| Attributional Style Training "Positive Interpretation Training"                                   | P95                                                                                                                                                                      | 1           |
| Coaching and Rewarding Emotional Skills (CARES)                                                   | P51                                                                                                                                                                      | 1           |
| Cognitive-Emotional Rehabilitation (REC)                                                          | P227                                                                                                                                                                     | 1           |
| Emotional Management Training (EMT)                                                               | P43                                                                                                                                                                      | 1           |
| Emotion Recognition Training (SoCog-ERT)                                                          | P133                                                                                                                                                                     | 1           |
| E-Motional Training                                                                               | P225                                                                                                                                                                     | 1           |
| FaceGen                                                                                           | P202                                                                                                                                                                     | 1           |
| Gaïa s-face program                                                                               | P79                                                                                                                                                                      | 1           |
| JeStiMulE                                                                                         | P198                                                                                                                                                                     | 1           |
| Let's Talk about Emotions!                                                                        | P151                                                                                                                                                                     | 1           |
| LIFEisGAME                                                                                        | P5                                                                                                                                                                       | 1           |
| Mary/Eddie/Bill (MEB)                                                                             | P178                                                                                                                                                                     | 1           |
| Metacognition-Oriented Social Skills Training (MOSST)                                             | P152                                                                                                                                                                     | 1           |
| Microexpression Recognition Training Tool (The MIX Program)                                       | P190                                                                                                                                                                     | 1           |
| Nonverbal communication, Emotion recognition, and Theory of mind Training (Seaver-NETT)           | P201                                                                                                                                                                     | 1           |
| Social Cognition and Interaction Training Modified for Family-Assisted (F-SCIT)                   | P209                                                                                                                                                                     | 1           |
| Social Cognition and Interaction Training Modified for Inpatient Forensic Wards (IFW-SCIT)        | P211                                                                                                                                                                     | 1           |
| Social Cognition Enhancement Training (SCET)                                                      | P44                                                                                                                                                                      | 1           |
| Theory-of-Mind based Social Skills Group Training for Children and Adolescents with ASD (TOMTASS) | P24                                                                                                                                                                      | 1           |
| Understanding Social Situations (USS)                                                             | P71                                                                                                                                                                      | 1           |
| <b>(Unnamed) Intervention Focused on</b>                                                          |                                                                                                                                                                          |             |
| <b>Ref</b>                                                                                        | <b>#ref</b>                                                                                                                                                              |             |
| Theory of Mind                                                                                    | P1, P2, P3, P15, P16, P20, P35, P42, P58, P69, P87, P90, P91, P105, P107, P110, P127, P134, P150, P155, P168, P169, P187, P194, P195, P197, P217, P218, P234, P239, P240 | 31          |
| Attributional Bias                                                                                | P36, P56, P72, P82, P154, P160, P203, P222, P223, P224                                                                                                                   | 10          |
| Emotional Processing                                                                              | P15, P16, P25, P53, P56, P90, P91, P97, P107, P145, P150, P156, P165, P171, P173, P196, P199, P208, P236                                                                 | 19          |
| Social Perception                                                                                 | P137, P107                                                                                                                                                               | 2           |

| <b>Broad-Based Intervention</b>                                            | <b>Ref</b>                                               | <b>#ref</b> |
|----------------------------------------------------------------------------|----------------------------------------------------------|-------------|
| Cognitive Enhancement Therapy (CET)                                        | P60, P61, P62, P63, P64, P65, P66, P67, P100, P109, P121 | 11          |
| Integrated Psychological Therapy (IPT)                                     | P74, P172, P206, P241                                    | 4           |
| Auditory-Based Cognitive Training plus Social-Cognition Training (AT+ SCT) | P101, P102, P192                                         | 3           |
| Cognitive Pragmatic Treatment (CPT)                                        | P28, P76                                                 | 2           |
| REHACOP (Programa de REHAbilitación COgnitiva en Psicosis)                 | P157, P158                                               | 2           |
| Computerized Drill Training (CDT) Program                                  | P34                                                      | 1           |
| Mind Reading: Interactive Guide to Emotions (MRIGE)                        | P122                                                     | 1           |
| Integrated Neurocognitive Therapy (INT)                                    | P143                                                     | 1           |
| Neuropersonal Trainer- Mental Health (NPT + MH)                            | P70                                                      | 1           |

| <b>Non-Specific Treatment of Social Cognition</b> | <b>Ref</b>                                                                                                                                          | <b>#ref</b>       |
|---------------------------------------------------|-----------------------------------------------------------------------------------------------------------------------------------------------------|-------------------|
| Cognitive and Behavioral Therapies                | P6, P7, P8, P9, P11, P12, P13, P31, P50, P54, P57, P73, P75, P89, P93, P106, P113, P136, P146, P147, P149, P166, P176, P184, P200, P210, P226, P229 | 28                |
| Neurocognition Training                           | P23, P30, P39, P140, P148                                                                                                                           | 5                 |
| Art Therapy                                       | P114, P142, P175, P205                                                                                                                              | 4                 |
| Mindfulness                                       | P52, P112, P139, P207                                                                                                                               | 4                 |
| Physical activity                                 | P37, P77, P148                                                                                                                                      | 3                 |
| Reading                                           | P29, P111, P163                                                                                                                                     | 3                 |
| Films                                             | P159, P235                                                                                                                                          | 2                 |
| Meditation                                        | P129, P135                                                                                                                                          | 2                 |
| Other psychotherapies                             | P55, P78                                                                                                                                            | 2                 |
| Psychoeducation                                   | P167, P174                                                                                                                                          | 2                 |
| Psychosocial and Employment Rehabilitation        | P4, P49                                                                                                                                             | 2                 |
| Animal-Assisted Therapy                           | P193                                                                                                                                                | 1                 |
| <a href="#">Language Therapy</a>                  | <a href="#">P68</a>                                                                                                                                 | <a href="#">1</a> |
