# Supplementary material for: Social cognition remediation interventions: A systematic mapping review
Source: PubMed Central journal article supplement (PMC6594616; doi:10.1371/journal.pone.0218720), 2019-06-26
Supplement: pone.0218720.s004.pdf [file pone.0218720.s004.pdf]

## S2: Selected papers

- P1 Adibsereshki, N., Abdolazadeh, M., Karmilo, M., & Hasanzadeh, M. (2014). The effectiveness of theory of mind training on the adaptive behavior of students with intellectual disability. *Journal of Special Education and Rehabilitation, 15*(1–2). <https://doi.org/10.2478/jser-2014-0006>
- P2 Adibsereshki, N., Nesayan, A., Asadi Gandomani, R., & Karimlou, M. (2015). The effectiveness of theory of mind training on the social skills of children with high functioning autism spectrum disorders. *Iranian Journal of Child Neurology, 9*(3), 40–49.
- P3 Allen, J. R., & Kinsey, K. (2013). Teaching theory of mind. *Early Education & Development, 24*(6), 865–876. <https://doi.org/10.1080/10409289.2013.745182>
- P4 Álvarez, J. C., Tourinõ, R., Abelleira, C., Fernández, J., Baena, E., Giráldez, A., & Bordón, R. (2013). Social cognition and schizophrenia: Differences between users of psychosocial rehabilitation day center and from a supported employment program. *Rehabilitacion Psicosocial, 10*(2), 4–9.
- P5 Alves, S., Marques, A., Queirós, C., & Orvalho, V. (2013). LIFEisGAME prototype: A serious game about emotions for children with autism spectrum disorders. *PsychNology Journal, 11*(3), 191–211.
- P6 Babl, A., grosse Holtforth, M., Heer, S., Lin, M., Stähli, A., Holstein, D., ... Caspar, F. (2016). Psychotherapy integration under scrutiny: investigating the impact of integrating emotion-focused components into a CBT-based approach: a study protocol of a randomized controlled trial. *BMC Psychiatry, 16*(1), 423. <https://doi.org/10.1186/s12888-016-1136-7>
- P7 Baghdadli, A., Brisot-Dubois, J., Picot, M.-C., & Michelon, C. (2010). Comparaison de l'effet de deux interventions prosociales sur l'évolution des capacités d'identification des expressions faciales et du raisonnement social d'enfants avec un syndrome d'Asperger ou autisme de haut niveau. *Neuropsychiatrie de l'Enfance et de l'Adolescence, 58*(8), 456–462. <https://doi.org/10.1016/j.neurenf.2010.06.009>
- P8 Baghdadli, A., Brisot, J., Henry, V., Michelon, C., Soussana, M., Rattaz, C., & Picot, M. C. (2013). Social skills improvement in children with high-functioning autism: a pilot randomized controlled trial. *European Child & Adolescent Psychiatry, 22*(7), 433–442. <https://doi.org/10.1007/s00787-013-0388-8>
- P9 Barginquast, R., Schweitzer, R. D., & Drake, S. (2015). Reawakening reflective capacity in the psychotherapy of schizophrenia: A case study. *Journal of Clinical Psychology, 71*(2), 136–145. <https://doi.org/10.1002/jclp.22149>
- P10 Bartholomeusz, C. F., Allott, K., Killackey, E., Liu, P., Wood, S. J., & Thompson, A. (2013). Social cognition training as an intervention for improving functional outcome in first-episode psychosis: A feasibility study. *Early Intervention in Psychiatry, 7*(4), 421–426. <https://doi.org/10.1111/eip.12036>
- P11 Bauminger-Zviely, N., Eden, S., Zancanaro, M., Weiss, P. L., & Gal, E. (2013). Increasing social engagement in children with high-functioning autism spectrum disorder using collaborative technologies in the school environment. *Autism, 17*(3), 317–339. <https://doi.org/10.1177/1362361312472989>
- P12 Bauminger, N. (2007a). Brief report: Group social-multimodal intervention for HFASD. *Journal of Autism and Developmental Disorders, 37*(8), 1605–1615. <https://doi.org/10.1007/s10803-006-0246-3>
- P13 Bauminger, N. (2007b). Brief report: Individual social-multi-modal intervention for HFASD. *Journal of Autism and Developmental Disorders, 37*(8), 1593–1604. <https://doi.org/10.1007/s10803-006-0245-4>
- P14 Bazin, N., Passerieux, C., & Hardy-Bayle, M.-C. (2010). ToMRemed : une technique de remédiation cognitive centrée sur la théorie de l'esprit pour les patients schizophrènes. *Journal de Thérapie Comportementale et Cognitive, 20*(1), 16–21. <https://doi.org/10.1016/j.jtcc.2010.02.001>
- P15 Bechi, M., Bosia, M., Spangaro, M., Buonocore, M., Cocchi, F., Pignoni, A., ... Cavallaro, R. (2015). Combined social cognitive and neurocognitive rehabilitation strategies in schizophrenia: Neuropsychological and psychopathological influences on theory of mind improvement. *Psychological Medicine, 45*(15), 3147–3157. <https://doi.org/10.1017/S0033291715001129>
- P16 Bechi, M., Riccaboni, R., Ali, S., Fresi, F., Buonocore, M., Bosia, M., ... Cavallaro, R. (2012). Theory of mind and emotion processing training for patients with schizophrenia: Preliminary findings. *Psychiatry Research, 198*(3), 371–377. <https://doi.org/10.1016/j.psychres.2012.02.004>
- P17 Bechi, M., Spangaro, M., Bosia, M., Zanoletti, A., Fresi, F., Buonocore, M., ... Cavallaro, R. (2013). Theory of mind intervention for outpatients with schizophrenia. *Neuropsychological Rehabilitation, 23*(3), 383–400. <https://doi.org/10.1080/09602011.2012.762751>
- P18 Begeer, S., Gevers, C., Clifford, P., Verhoeve, M., Kat, K., Hoddenbach, E., & Boer, F. (2011). Theory of mind training in children with autism: A randomized controlled trial. *Journal of Autism and Developmental Disorders, 41*(8), 997–1006. <https://doi.org/10.1007/s10803-010-1121-9>
- P19 Begeer, S., Howlin, P., Hoddenbach, E., Clauser, C., Lindauer, R., Clifford, P., ... Koot, H. M. (2015). Effects and moderators of a short theory of mind intervention for children with autism spectrum disorder: A randomized controlled trial. *Autism Research, 8*(6), 738–748. <https://doi.org/10.1002/aur.1489>
- P20 Benson, J. E., Sabbagh, M. A., Carlson, S. M., & Zelazo, P. D. (2013). Individual differences in executive functioning predict preschoolers' improvement from theory-of-mind training. *Developmental Psychology, 49*(9), 1615–1627. <https://doi.org/10.1037/a0031056>

- P21 Bianco, F., & Lecce, S. (2016). Translating child development research into practice: Can teachers foster children's theory of mind in primary school? *British Journal of Educational Psychology*, *86*(4), 592–605. <https://doi.org/10.1111/bjep.12125>
- P22 Bianco, F., Lecce, S., & Banerjee, R. (2016). Conversations about mental states and theory of mind development during middle childhood: A training study. *Journal of Experimental Child Psychology*, *149*, 41–61. <https://doi.org/10.1016/j.jecp.2015.11.006>
- P23 Bigorra, A., Garolera, M., Guijarro, S., & Hervas, A. (2016). Impact of working memory training on hot executive functions (decision-making and theory of mind) in children with ADHD: a randomized controlled trial. *Neuropsychiatry*, *6*(5). <https://doi.org/10.4172/Neuropsychiatry.1000147>
- P24 Biscaldi, M., Paschke-Müller, M., Rauh, R., & Schaller, U. M. (2016). Evaluation des Freiburger TOMTASS - Ein soziales Kompetenztraining mit Schwerpunkt auf Theory of Mind für Kinder und Jugendliche mit hochfunktionalen Autismus-Spektrum-Störungen. *Zeitschrift Für Psychiatrie, Psychologie Und Psychotherapie*, *64*, 269–275. <https://doi.org/10.1024/1661-4747/a000288>
- P25 Blanch-Hartigan, D. (2012). An effective training to increase accurate recognition of patient emotion cues. *Patient Education and Counseling*, *89*(2), 274–280. <https://doi.org/10.1016/j.pec.2012.08.002>
- P26 Bölte, S., Ciaramidaro, A., Schlitt, S., Hainz, D., Kliemann, D., Beyer, A., ... Walter, H. (2015). Training-induced plasticity of the social brain in autism spectrum disorder. *The British Journal of Psychiatry*, *207*(2), 149–157. <https://doi.org/10.1192/bjp.bp.113.143784>
- P27 Bölte, S., Hubl, D., Feineis-Matthews, S., Prvulovic, D., Dierks, T., & Poustka, F. (2006). Facial affect recognition training in autism: Can we animate the fusiform gyrus? *Behavioral Neuroscience*, *120*(1), 211–216. <https://doi.org/10.1037/0735-7044.120.1.211>
- P28 Bosco, F. M., Gabbatore, I., Gastaldo, L., & Sacco, K. (2016). Communicative-pragmatic treatment in schizophrenia: a pilot study. *Frontiers in Psychology*, *7*. <https://doi.org/10.3389/fpsyg.2016.00166>
- P29 Bowes, A., & Katz, A. (2015). Metaphor creates intimacy and temporarily enhances theory of mind. *Memory & Cognition*, *43*(6), 953–963. <https://doi.org/10.3758/s13421-015-0508-4>
- P30 Bowie, C. R., Grossman, M., Gupta, M., Holshausen, K., & Best, M. W. (2016). Action-based cognitive remediation for individuals with serious mental illnesses: Effects of real-world simulations and goal setting on functional and vocational outcomes. *Psychiatric Rehabilitation Journal*. <https://doi.org/10.1037/prj0000189>
- P31 Brakoulias, V., Langdon, R., Sloss, G., Coltheart, M., Meares, R., & Harris, A. (2008). Delusions and reasoning: A study involving cognitive behavioural therapy. *Cognitive Neuropsychiatry*, *13*(2), 148–165. <https://doi.org/10.1080/13546800801900587>
- P32 Brüne, M., Dimaggio, G., & Edell, M.-A. (2013). Mentalization-based group therapy for inpatients with borderline personality disorder: Preliminary findings. *Clinical Neuropsychiatry*, *10*(5), 196–201.
- P33 Buck, K. D., & George, S. E. (2016). Metacognitive reflective and insight therapy for a person who gained maximal levels of metacognitive capacity and was able to terminate therapy. *Journal of Contemporary Psychotherapy*, *46*(4), 187–195. <https://doi.org/10.1007/s10879-016-9322-y>
- P34 Byrne, L. K., Pan, L., McCabe, M., Mellor, D., & Xu, Y. (2015). Assessment of a six-week computer-based remediation program for social cognition in chronic schizophrenia. *Shanghai Archives of Psychiatry*, *27*(5), 296–306. <https://doi.org/10.11919/j.issn.1002-0829.215095>
- P35 Carbonero Martín, M. Á., Sáiz Manzanares, M. C., & Román Sánchez, J. M. (2013). Effect of a metacognitive training program of mentalist skills. *Psicothema*, *25*(1), 31–37. <https://doi.org/10.7334/psicothema2011.192>
- P36 Cardi, V., Esposito, M., Bird, G., Rhind, C., Yiend, J., Schifano, S., ... Treasure, J. (2015). A preliminary investigation of a novel training to target cognitive biases towards negative social stimuli in anorexia nervosa. *Journal of Affective Disorders*, *188*, 188–193. <https://doi.org/10.1016/j.jad.2015.08.019>
- P37 Carlier, M., Mainguet, B., & Delevoeye-Turrell, Y. (2016). Cognitive exercise through body movement: Using a fun and short neuropsychological tool to adapt physical activity and enhance pleasure in individuals suffering from mental illnesses. *Psychologie Française*, *61*(4), 349–359. <https://doi.org/10.1016/j.psfr.2015.05.004>
- P38 Cavallini, E., Bianco, F., Bottiroli, S., Rosi, A., Vecchi, T., & Lecce, S. (2015). Training for generalization in theory of mind: a study with older adults. *Frontiers in Psychology*, *6*. <https://doi.org/10.3389/fpsyg.2015.01123>
- P39 Cavallo, M., Trivelli, F., Adenzato, M., Bidoia, E., Giarretto, R. M., Oliva, F., & Luca Ostacoli, Anisa Sala, R. L. P. (2013). Do neuropsychological and social cognition abilities in schizophrenia change after intensive cognitive training? A pilot study. *Clinical Neuropsychiatry*, *10*(5), 202–221.
- P40 Chan, R. C. K., Gao, X., Li, X., Li, H., Cui, J., Deng, Y., & Wang, Y. (2010). The social cognition and interaction training (SCIT): An extension to individuals with schizotypal personality features. *Psychiatry Research*, *178*(1), 208–210. <https://doi.org/10.1016/j.psychres.2010.03.017>
- P41 Chen, C.-H., Lee, I.-J., & Lin, L.-Y. (2016). Augmented reality-based video-modeling storybook of nonverbal facial cues for children with autism spectrum disorder to improve their perceptions and judgments of facial expressions and emotions. *Computers in Human Behavior*, *55*, 477–485. <https://doi.org/10.1016/j.chb.2015.09.033>
- P42 Chevallier, C., Parish-Morris, J., Tonge, N., Le, L., Miller, J., & Schultz, R. T. (2014). Susceptibility to the audience effect explains performance gap between children with and without autism in a theory of mind task.

- P43 Choi, E. S., & Lee, W. K. (2015). Comparative effects of emotion management training and social skills training in Korean children with ADHD. *Journal of Attention Disorders*, 19(2), 138–146. <https://doi.org/10.1177/1087054713496460>
- P44 Choi, K.-H., & Kwon, J.-H. (2006). Social cognition enhancement training for schizophrenia: A preliminary randomized controlled trial. *Community Mental Health Journal*, 42(2), 177–187. <https://doi.org/10.1007/s10597-005-9023-6>
- P45 Combs, D. R., Adams, S. D., Penn, D. L., Roberts, D., Tiegreen, J., & Stem, P. (2007). Social cognition and interaction training (SCIT) for inpatients with schizophrenia spectrum disorders: Preliminary findings. *Schizophrenia Research*, 91(1–3), 112–116. <https://doi.org/10.1016/j.schres.2006.12.010>
- P46 Combs, D. R., Chapman, D., Waguspack, J., Basso, M. R., & Penn, D. L. (2011). Attention shaping as a means to improve emotion perception deficits in outpatients with schizophrenia and impaired controls. *Schizophrenia Research*, 127(1–3), 151–156. <https://doi.org/10.1016/j.schres.2010.05.011>
- P47 Combs, D. R., Penn, D. L., Tiegreen, J. A., Nelson, A., Ledet, S. N., Basso, M. R., & Elerson, K. (2009). Stability and generalization of social cognition and interaction training (SCIT) for schizophrenia: Six-month follow-up results. *Schizophrenia Research*, 112(1–3), 196–197. <https://doi.org/10.1016/j.schres.2009.04.010>
- P48 Combs, D. R., Tosheva, A., Penn, D. L., Basso, M. R., Wanner, J. L., & Laib, K. (2008). Attentional-shaping as a means to improve emotion perception deficits in schizophrenia. *Schizophrenia Research*, 105(1–3), 68–77. <https://doi.org/10.1016/j.schres.2008.05.018>
- P49 Cory, L., Dattilo, J., & Williams, R. (2006). Effects of a leisure education program on social knowledge and skills of youth with cognitive disabilities. *Therapeutic Recreation Journal*, 40(3), 144–164.
- P50 Croke, P. J., Winner, M. G., & Olswang, L. B. (2016). Thinking socially. *Topics in Language Disorders*, 36(3), 284–298. <https://doi.org/10.1097/TLD.0000000000000094>
- P51 Datyner, A., Kimonis, E. R., Hunt, E., & Armstrong, K. (2016). Using a novel emotional skills module to enhance empathic responding for a child with conduct disorder with limited prosocial emotions. *Clinical Case Studies*, 15(1), 35–52. <https://doi.org/10.1177/1534650115588978>
- P52 de Bruin, E. I., Blom, R., Smit, F. M., van Steensel, F. J., & Bogels, S. M. (2015). MYmind: Mindfulness training for youngsters with autism spectrum disorders and their parents. *Autism*, 19(8), 906–914. <https://doi.org/10.1177/1362361314553279>
- P53 DeGutis, J., DeNicola, C., Zink, T., McGlinchey, R., & Milberg, W. (2011). Training with own-race faces can improve processing of other-race faces: Evidence from developmental prosopagnosia. *Neuropsychologia*, 49(9), 2505–2513. <https://doi.org/10.1016/j.neuropsychologia.2011.04.031>
- P54 Devlin, R. S., & Gibbs, J. C. (2010). Responsible adult culture (RAC): Cognitive and behavioral changes at a community-based correctional facility. *Journal of Research in Character Education*, 8(1), 1–20.
- P55 Diamond, G. M., Shahar, B., Sabo, D., & Tsvieli, N. (2016). Attachment-based family therapy and emotion-focused therapy for unresolved anger: the role of productive emotional processing. *Psychotherapy*, 53(1), 34–44. <https://doi.org/10.1037/pst0000025>
- P56 Didehbandi, N., Allen, T., Kandalaf, M., Krawczyk, D., & Chapman, S. (2016). Virtual reality social cognition training for children with high functioning autism. *Computers in Human Behavior*, 62, 703–711. <https://doi.org/10.1016/j.chb.2016.04.033>
- P57 Dimaggio, G., D'Urzo, M., Pasinetti, M., Salvatore, G., Lysaker, P. H., Catania, D., & Popolo, R. (2015). Metacognitive interpersonal therapy for co-occurrent avoidant personality disorder and substance abuse. *Journal of Clinical Psychology*, 71(2), 157–166. <https://doi.org/10.1002/jclp.22151>
- P58 Ding, X. P., Wellman, H. M., Wang, Y., Fu, G., & Lee, K. (2015). Theory-of-mind training causes honest young children to lie. *Psychological Science*, 26(11), 1812–1821. <https://doi.org/10.1177/0956797615604628>
- P59 Drusch, K., Stroth, S., Kamp, D., Frommann, N., & Wölwer, W. (2014). Effects of training of affect recognition on the recognition and visual exploration of emotional faces in schizophrenia. *Schizophrenia Research*, 159(2–3), 485–490. <https://doi.org/10.1016/j.schres.2014.09.003>
- P60 Eack, S., Greenwald, D., Hogarty, S., Cooley, S., DiBarry, A. L., Montrose, D., & Keshavan, M. (2009). Cognitive enhancement therapy for early-course schizophrenia: Effects of a two-year randomized controlled trial. *Psychiatric Services*, 60(11). <https://doi.org/10.1176/appi.ps.60.11.1468>
- P61 Eack, S. M., Greenwald, D. P., Hogarty, S. S., & Keshavan, M. S. (2010). One-year durability of the effects of cognitive enhancement therapy on functional outcome in early schizophrenia. *Schizophrenia Research*, 120(1–3), 210–216. <https://doi.org/10.1016/j.schres.2010.03.042>
- P62 Eack, S. M., Hogarty, G. E., Cho, R. Y., Prasad, K. M. R., Greenwald, D. P., Hogarty, S. S., & Keshavan, M. S. (2010). Neuroprotective effects of cognitive enhancement therapy against gray matter loss in early schizophrenia. *Archives of General Psychiatry*, 67(7), 674. <https://doi.org/10.1001/archgenpsychiatry.2010.63>
- P63 Eack, S. M., Hogarty, G. E., Greenwald, D. P., Hogarty, S. S., & Keshavan, M. S. (2007). Cognitive enhancement therapy improves emotional intelligence in early course schizophrenia: Preliminary effects. *Schizophrenia Research*, 89(1–3), 308–311. <https://doi.org/10.1016/j.schres.2006.08.018>
- P64 Eack, S. M., Hogarty, S. S., Greenwald, D. P., Litschge, M. Y., McKnight, S. A. F., Bangalore, S. S., ...

- Cornelius, J. R. (2015). Cognitive enhancement therapy in substance misusing schizophrenia: Results of an 18-month feasibility trial. *Schizophrenia Research*, *161*(2–3), 478–483. <https://doi.org/10.1016/j.schres.2014.11.017>
- P65 Eack, S. M., Mesholam-Gately, R. I., Greenwald, D. P., Hogarty, S. S., & Keshavan, M. S. (2013). Negative symptom improvement during cognitive rehabilitation: Results from a 2-year trial of Cognitive Enhancement Therapy. *Psychiatry Research*, *209*(1), 21–26. <https://doi.org/10.1016/j.psychres.2013.03.020>
- P66 Eack, S. M., Newhill, C. E., & Keshavan, M. S. (2016). Cognitive enhancement therapy improves resting-state functional connectivity in early course schizophrenia. *Journal of the Society for Social Work and Research*, *7*(2), 211–230. <https://doi.org/10.1086/686538>
- P67 Eack, S. M., Pogue-Geile, M. F., Greenwald, D. P., Hogarty, S. S., & Keshavan, M. S. (2011). Mechanisms of functional improvement in a 2-year trial of cognitive enhancement therapy for early schizophrenia. *Psychological Medicine*, *41*(6), 1253–1261. <https://doi.org/10.1017/S0033291710001765>
- P68 Felisberti, F. M., & Pavey, L. (2010). Contextual modulation of biases in face recognition. *PLoS ONE*, *5*(9), e12939. <https://doi.org/10.1371/journal.pone.0012939>
- P69 Feng, H., Lo, Y. -y., Tsai, S., & Cartledge, G. (2008). The effects of theory-of-mind and social skill training on the social competence of a sixth-grade student with autism. *Journal of Positive Behavior Interventions*, *10*(4), 228–242. <https://doi.org/10.1177/1098300708319906>
- P70 Fernandez-Gonzalo, S., Turon, M., Jodar, M., Pousa, E., Hernandez Rambla, C., García, R., & Palao, D. (2015). A new computerized cognitive and social cognition training specifically designed for patients with schizophrenia/schizoaffective disorder in early stages of illness: A pilot study. *Psychiatry Research*, *228*(3), 501–509. <https://doi.org/10.1016/j.psychres.2015.06.007>
- P71 Fiszdon, J. M., Roberts, D. L., Penn, D. L., Choi, K.-H., Tek, C., Choi, J., & Bell, M. D. (2016). Understanding social situations (USS): A proof-of-concept social-cognitive intervention targeting theory of mind and attributional bias in individuals with psychosis. *Psychiatric Rehabilitation Journal*. <https://doi.org/10.1037/prj0000190>
- P72 Fitzgerald, A., Rawdon, C., & Dooley, B. (2016). A randomized controlled trial of attention bias modification training for socially anxious adolescents. *Behaviour Research and Therapy*, *84*, 1–8. <https://doi.org/10.1016/j.brat.2016.06.003>
- P73 Fu, C. H. Y., Williams, S. C. R., Cleare, A. J., Scott, J., Mitterschiffthaler, M. T., Walsh, N. D., ... Murray, R. M. (2008). Neural responses to sad facial expressions in major depression following cognitive behavioral therapy. *Biological Psychiatry*, *64*(6), 505–512. <https://doi.org/10.1016/j.biopsych.2008.04.033>
- P74 Fuentes, I., García, S., Ruiz, J. C., Soler, M. J., & Roder, V. (2007). Social perception training in schizophrenia: A pilot study. *International Journal of Psychology and Psychological Therapy*, *7*(1), 1–12.
- P75 Fung, A. (2007). A qualitative evaluation of social-cognitive changes in children with reactively aggressive behaviors. *Journal of School Violence*, *6*(1), 45–64. [https://doi.org/10.1300/J202v06n01\\_04](https://doi.org/10.1300/J202v06n01_04)
- P76 Gabbatore, I., Sacco, K., Angeleri, R., Zettin, M., Bara, B. G., & Bosco, F. M. (2015). Cognitive pragmatic treatment: A rehabilitative program for traumatic brain injury individuals. *Journal of Head Trauma Rehabilitation*, *30*(5), E14–E28. <https://doi.org/10.1097/HTR.0000000000000087>
- P77 Gabriels, R. L., Pan, Z., Dechant, B., Agnew, J. A., Brim, N., & Mesibov, G. (2015). Randomized controlled trial of therapeutic horseback riding in children and adolescents with autism spectrum disorder. *Journal of the American Academy of Child & Adolescent Psychiatry*, *54*(7), 541–549. <https://doi.org/10.1016/j.jaac.2015.04.007>
- P78 Galende, N., de Miguél, M. S., & Arranz, E. (2012). The role of parents' distancing strategies in the development of five-year-old children's theory of mind. *Early Child Development and Care*, *182*(2), 207–220. <https://doi.org/10.1080/03004430.2011.553676>
- P79 Gaudelus, B., Virgile, J., Geliot, S., & Franck, N. (2016). Improving facial emotion recognition in schizophrenia: a controlled study comparing specific and attentional focused cognitive remediation. *Frontiers in Psychiatry*, *7*. <https://doi.org/10.3389/fpsy.2016.00105>
- P80 Gawęda, Ł., Krężolek, M., Olbryś, J., Turska, A., & Kokoszka, A. (2015). Decreasing self-reported cognitive biases and increasing clinical insight through meta-cognitive training in patients with chronic schizophrenia. *Journal of Behavior Therapy and Experimental Psychiatry*, *48*, 98–104. <https://doi.org/10.1016/j.jbtep.2015.02.002>
- P81 Gevers, C., Clifford, P., Mager, M., & Boer, F. (2006). Brief report: A theory-of-mind-based social-cognition training program for school-aged children with pervasive developmental disorders: An open study of its effectiveness. *Journal of Autism and Developmental Disorders*, *36*(4), 567–571. <https://doi.org/10.1007/s10803-006-0095-0>
- P82 Ghoreishian, M. A., Neshat Doust, H. T., & Molavi, H. (2010). Attributional style retraining and marital satisfaction among Iranian couples. *Developmental Psychology*, *6*(24), 329–336.
- P83 Gil-Sanz, D., Fernández-Modamio, M., Bengochea-Seco, R., Arrieta-Rodríguez, M., & Pérez-Fuentes, G. (2014). Efficacy of the social cognition training program in a sample of schizophrenic outpatients. *Clinical Schizophrenia & Related Psychoses*, (aop), 1–27. <https://doi.org/10.3371/CSRP.GIFE.013114>

- P84 Gil-Sanz, D., Fernández-Modamio, M., Bengochea-Seco, R., Arrieta-Rodríguez, M., & Pérez-Fuentes, G. (2016). Efficacy of the social cognition training program in a sample of outpatients with schizophrenia. *Clinical Schizophrenia & Related Psychoses*, *10*(3), 154–162. <https://doi.org/10.3371/1935-1232.10.3.154>
- P85 Gil-Sanz, D., Lorenzo, M. D., Seco, R. B., Rodríguez, M. A., Martínez, I. L., Calleja, R. S., & Soltero, A. Á. (2009). Efficacy of a social cognition training program for schizophrenic patients: A pilot study. *The Spanish Journal of Psychology*, *12*(1), 184–191. <https://doi.org/10.1017/S1138741600001591>
- P86 Gohar, S. M., Hamdi, E., El Ray, L. A., Horan, W. P., & Green, M. F. (2013). Adapting and evaluating a social cognitive remediation program for schizophrenia in Arabic. *Schizophrenia Research*, *148*(1–3), 12–17. <https://doi.org/10.1016/j.schres.2013.05.008>
- P87 Gola, A. A. H. (2012). Mental verb input for promoting children's theory of mind: A training study. *Cognitive Development*, *27*(1), 64–76. <https://doi.org/10.1016/j.cogdev.2011.10.003>
- P88 Golan, O., & Baron-Cohen, S. (2006). Systemizing empathy: Teaching adults with Asperger syndrome or high-functioning autism to recognize complex emotions using interactive multimedia. *Development and Psychopathology*, *18*(2). <https://doi.org/10.1017/S0954579406060305>
- P89 Goldstein, T. R., & Winner, E. (2012). Enhancing empathy and theory of mind. *Journal of Cognition and Development*, *13*(1), 19–37. <https://doi.org/10.1080/15248372.2011.573514>
- P90 Grazzani, I., Ornaghi, V., Agliati, A., & Brazzelli, E. (2016). How to foster toddlers' mental-state talk, emotion understanding, and prosocial behavior: A conversation-based intervention at nursery school. *Infancy*, *21*(2), 199–227. <https://doi.org/10.1111/inf.12107>
- P91 Grazzani, I., Ornaghi, V., & Brockmeier, J. (2016). Conversation on mental states at nursery: Promoting social cognition in early childhood. *European Journal of Developmental Psychology*, *13*(5), 563–581. <https://doi.org/10.1080/17405629.2015.1127803>
- P92 Habel, U., Koch, K., Kellermann, T., Reske, M., Frommann, N., Wölwer, W., ... Schneider, F. (2010). Training of affect recognition in schizophrenia: Neurobiological correlates. *Social Neuroscience*, *5*(1), 92–104. <https://doi.org/10.1080/17470910903170269>
- P93 Han, D. H., Chung, U., Shin, Y. J., & Renshaw, P. (2016). A prosocial online game for social cognition training in adolescents with high-functioning autism: an fMRI study. *Neuropsychiatric Disease and Treatment*, *65*1. <https://doi.org/10.2147/NDT.S94669>
- P94 Hasson-Ohayon, I., Mashiach-Eizenberg, M., Avidan, M., Roberts, D. L., & Roe, D. (2014). Social cognition and interaction training: Preliminary results of an RCT in a community setting in Israel. *Psychiatric Services*, *65*(4), 555–558. <https://doi.org/10.1176/appi.ps.201300146>
- P95 Hawkins, K. A., & Cogle, J. R. (2013). Effects of interpretation training on hostile attribution bias and reactivity to interpersonal insult. *Behavior Therapy*, *44*(3), 479–488. <https://doi.org/10.1016/j.beth.2013.04.005>
- P96 Hernández-Vidal, J. V., Ricarte, J., Ros, L., & Latorre, J. M. (2013). Memoria de trabajo y cambio en la atribución de hostilidad en situaciones sociales accidentales en pacientes con esquizofrenia paranoide. *Revista de Psicología Social*, *28*(3), 361–372. <https://doi.org/10.1174/021347413807719120>
- P97 Herpertz, S., Schütz, A., & Nezelek, J. (2016). Enhancing emotion perception, a fundamental component of emotional intelligence: using multiple-group SEM to evaluate a training program. *Personality and Individual Differences*, *95*, 11–19. <https://doi.org/10.1016/j.paid.2016.02.015>
- P98 Hillis, J. D., Leonhardt, B. L., Vohs, J. L., Buck, K. D., Salvatore, G., Popolo, R., ... Lysaker, P. H. (2015). Metacognitive reflective and insight therapy for people in early phase of a schizophrenia spectrum disorder. *Journal of Clinical Psychology*, *71*(2), 125–135. <https://doi.org/10.1002/jclp.22148>
- P99 Hoddenbach, E., Koot, H. M., Clifford, P., Gevers, C., Clauser, C., Boer, F., & Begeer, S. (2012). Individual differences in the efficacy of a short theory of mind intervention for children with autism spectrum disorder: a randomized controlled trial. *Trials*, *13*(1), 206. <https://doi.org/10.1186/1745-6215-13-206>
- P100 Hogarty, G. E., Greenwald, D. P., & Eack, S. M. (2006). Durability and mechanism of effects of cognitive enhancement therapy. *Psychiatric Services*, *57*(12), 1751–1757. <https://doi.org/10.1176/appi.ps.57.12.1751>
- P101 Hooker, C. I., Bruce, L., Fisher, M., Verosky, S. C., Miyakawa, A., D'Esposito, M., & Vinogradov, S. (2013). The influence of combined cognitive plus social-cognitive training on amygdala response during face emotion recognition in schizophrenia. *Psychiatry Research: Neuroimaging*, *213*(2), 99–107. <https://doi.org/10.1016/j.psychres.2013.04.001>
- P102 Hooker, C. I., Bruce, L., Fisher, M., Verosky, S. C., Miyakawa, A., & Vinogradov, S. (2012). Neural activity during emotion recognition after combined cognitive plus social cognitive training in schizophrenia. *Schizophrenia Research*, *139*(1–3), 53–59. <https://doi.org/10.1016/j.schres.2012.05.009>
- P103 Horan, W. P., Kern, R. S., Shokat-Fadai, K., Sergi, M. J., Wynn, J. K., & Green, M. F. (2009). Social cognitive skills training in schizophrenia: an initial efficacy study of stabilized outpatients. *Schizophrenia Research*, *107*(1), 47–54. <https://doi.org/10.1016/j.schres.2008.09.006>
- P104 Horan, W. P., Kern, R. S., Tripp, C., Helleman, G., Wynn, J. K., Bell, M., ... Green, M. F. (2011). Efficacy and specificity of social cognitive skills training for outpatients with psychotic disorders. *Journal of Psychiatric Research*, *45*(8), 1113–1122. <https://doi.org/10.1016/j.jpsychires.2011.01.015>

- P105 Iao, L.-S., Leekam, S., Perner, J., & McConachie, H. (2011). Further evidence for nonspecificity of theory of mind in preschoolers: Training and transferability in the understanding of false beliefs and false signs. *Journal of Cognition and Development, 12*(1), 56–79. <https://doi.org/10.1080/15248372.2011.539523>
- P106 Jarrett, R. B., Vittengl, J. R., Doyle, K., & Clark, L. A. (2007). Changes in cognitive content during and following cognitive therapy for recurrent depression: Substantial and enduring, but not predictive of change in depressive symptoms. *Journal of Consulting and Clinical Psychology, 75*(3), 432–446. <https://doi.org/10.1037/0022-006X.75.3.432>
- P107 Kandalaf, M. R., Didehbani, N., Krawczyk, D. C., Allen, T. T., & Chapman, S. B. (2013). Virtual reality social cognition training for young adults with high-functioning autism. *Journal of Autism and Developmental Disorders, 43*(1), 34–44. <https://doi.org/10.1007/s10803-012-1544-6>
- P108 Kayser, N., Sarfati, Y., Besche, C., & Hardy-Baylé, M.-C. (2006). Elaboration of a rehabilitation method based on a pathogenetic hypothesis of “theory of mind” impairment in schizophrenia. *Neuropsychological Rehabilitation, 16*(1), 83–95. <https://doi.org/10.1080/09602010443000236>
- P109 Keshavan, M. S., Eack, S. M., Wojtalik, J. A., Prasad, K. M. R., Francis, A. N., Bhojraj, T. S., ... Hogarty, S. S. (2011). A broad cortical reserve accelerates response to cognitive enhancement therapy in early course schizophrenia. *Schizophrenia Research, 130*(1–3), 123–129. <https://doi.org/10.1016/j.schres.2011.05.001>
- P110 Khodabakhshi, M., Malekpour, M., & Abedi, A. (2015). To evaluate the effectiveness of the training based on theory of mind on the function of mind reading and the executive functions in the children with autism Spectrum Disorders. *Iranian Journal of Psychiatry and Clinical Psychology, 21*(2), 155–166.
- P111 Kidd, D. C., & Castano, E. (2013). Reading literary fiction improves theory of mind. *Science, 342*(6156), 377–380. <https://doi.org/10.1126/science.1239918>
- P112 King, A. P., Block, S. R., Sripatha, R. K., Rauch, S. A. M., Porter, K. E., Favorite, T. K., ... Liberzon, I. (2016). A pilot study of mindfulness-based exposure therapy in OEF/OIF combat veterans with PTSD: altered medial frontal cortex and amygdala responses in social-emotional processing. *Frontiers in Psychiatry, 7*. <https://doi.org/10.3389/fpsy.2016.00154>
- P113 Klumpp, H., Fitzgerald, D. A., & Phan, K. L. (2013). Neural predictors and mechanisms of cognitive behavioral therapy on threat processing in social anxiety disorder. *Progress in Neuro-Psychopharmacology and Biological Psychiatry, 45*, 83–91. <https://doi.org/10.1016/j.pnpbp.2013.05.004>
- P114 Koehne, S., Behrends, A., Fairhurst, M. T., & Dziobek, I. (2016). Fostering social cognition through an imitation- and synchronization-based dance/movement intervention in adults with autism spectrum disorder: a controlled proof-of-concept study. *Psychotherapy and Psychosomatics, 85*(1), 27–35. <https://doi.org/10.1159/000441111>
- P115 Lacava, P. G., Golan, O., Baron-Cohen, S., & Smith Myles, B. (2007). Using assistive technology to teach emotion recognition to students with asperger syndrome. *Remedial and Special Education, 28*(3), 174–181. <https://doi.org/10.1177/07419325070280030601>
- P116 Lacava, P. G., Rankin, A., Mahlios, E., Cook, K., & Simpson, R. L. (2010). A single case design evaluation of a software and tutor intervention addressing emotion recognition and social interaction in four boys with ASD. *Autism, 14*(3), 161–178. <https://doi.org/10.1177/1362361310362085>
- P117 Lahera, G., Benito, A., Montes, J. M., Fernández-Liria, A., Olbert, C. M., & Penn, D. L. (2013). Social cognition and interaction training (SCIT) for outpatients with bipolar disorder. *Journal of Affective Disorders, 146*(1), 132–136. <https://doi.org/10.1016/j.jad.2012.06.032>
- P118 Lecce, S., Bianco, F., Demicheli, P., & Cavallini, E. (2014). Training preschoolers on first-order false belief understanding: Transfer on advanced ToM skills and metamemory. *Child Development, n/a-n/a*. <https://doi.org/10.1111/cdev.12267>
- P119 Lecce, S., Bianco, F., Devine, R. T., Hughes, C., & Banerjee, R. (2014). Promoting theory of mind during middle childhood: A training program. *Journal of Experimental Child Psychology, 126*, 52–67. <https://doi.org/10.1016/j.jecp.2014.03.002>
- P120 Lecce, S., Bottiroli, S., Bianco, F., Rosi, A., & Cavallini, E. (2015). Training older adults on theory of mind (ToM): Transfer on metamemory. *Archives of Gerontology and Geriatrics, 60*(1), 217–226. <https://doi.org/10.1016/j.archger.2014.10.001>
- P121 Lewandowski, K. E., Eack, S. M., Hogarty, S. S., Greenwald, D. P., & Keshavan, M. S. (2011). Is cognitive enhancement therapy equally effective for patients with schizophrenia and schizoaffective disorder? *Schizophrenia Research, 125*(2–3), 291–294. <https://doi.org/10.1016/j.schres.2010.11.017>
- P122 Lindenmayer, J.-P., McGurk, S. R., Khan, A., Kaushik, S., Thanju, A., Hoffman, L., ... Herrmann, E. (2013). Improving social cognition in schizophrenia: A pilot intervention combining computerized social cognition training with cognitive remediation. *Schizophrenia Bulletin, 39*(3), 507–517. <https://doi.org/10.1093/schbul/sbs120>
- P123 Lopata, C., Thomeer, M. L., Rodgers, J. D., Donnelly, J. P., & McDonald, C. A. (2016). RCT of mind reading as a component of a psychosocial treatment for high-functioning children with ASD. *Research in Autism Spectrum Disorders, 21*, 25–36. <https://doi.org/10.1016/j.rasd.2015.09.003>
- P124 Lopata, C., Thomeer, M. L., Volker, M. A., Nida, R. E., & Lee, G. K. (2008). Effectiveness of a manualized summer social treatment program for high-functioning children with autism spectrum disorders. *Journal of*

*Autism and Developmental Disorders*, 38(5), 890–904. <https://doi.org/10.1007/s10803-007-0460-7>

- P125 Lopata, C., Thomeer, M. L., Volker, M. A., Toomey, J. A., Nida, R. E., Lee, G. K., ... Rodgers, J. D. (2010). RCT of a manualized social treatment for high-functioning autism spectrum disorders. *Journal of Autism and Developmental Disorders*, 40(11), 1297–1310. <https://doi.org/10.1007/s10803-010-0989-8>
- P126 Loukas, K. M., Raymond, L., Perron, A. R., McHarg, L. A., & LaCroix Doe, T. C. (2015). Occupational transformation: Parental influence and social cognition of young adults with autism. *Work*, 50(3), 457–463. <https://doi.org/10.3233/WOR-141956>
- P127 Lu, H., Su, Y., & Wang, Q. (2008). Talking about others facilitates theory of mind in Chinese preschoolers. *Developmental Psychology*, 44(6), 1726–1736. <https://doi.org/10.1037/a0013074>
- P128 Luckhaus, C., Frommann, N., Stroth, S., Brinkmeyer, J., & Wölwer, W. (2013). Training of affect recognition in schizophrenia patients with violent offences: Behavioral treatment effects and electrophysiological correlates. *Social Neuroscience*, 8(5), 505–514. <https://doi.org/10.1080/17470919.2013.820667>
- P129 Lutz, A., Brefczynski-Lewis, J., Johnstone, T., & Davidson, R. J. (2008). Regulation of the neural circuitry of emotion by compassion meditation: Effects of meditative expertise. *PLoS ONE*, 3(3), e1897. <https://doi.org/10.1371/journal.pone.0001897>
- P130 Marsh, P. J., Langdon, R., McGuire, J., Harris, A., Polito, V., & Coltheart, M. (2013). An open clinical trial assessing a novel training program for social cognitive impairment in schizophrenia. *Australasian Psychiatry*, 21(2), 122–126. <https://doi.org/10.1177/1039856213475683>
- P131 Marsh, P. J., Green, M. J., Russell, T. A., McGuire, J., Harris, A., & Coltheart, M. (2010). Remediation of facial emotion recognition in schizophrenia: Functional predictors, generalizability, and durability. *American Journal of Psychiatric Rehabilitation*, 13(2), 143–170. <https://doi.org/10.1080/15487761003757066>
- P132 Marsh, P. J., Luckett, G., Russell, T., Coltheart, M., & Green, M. J. (2012). Effects of facial emotion recognition remediation on visual scanning of novel face stimuli. *Schizophrenia Research*, 141(2–3), 234–240. <https://doi.org/10.1016/j.schres.2012.08.006>
- P133 Marsh, P. J., Polito, V., Singh, S., Coltheart, M., Langdon, R., & Harris, A. W. (2016). A quasi-randomized feasibility pilot study of specific treatments to improve emotion recognition and mental-state reasoning impairments in schizophrenia. *BMC Psychiatry*, 16(1), 360. <https://doi.org/10.1186/s12888-016-1064-6>
- P134 Martín García, M. J., Gómez Becerra, I., & Garro Espín, M. J. (2012). Theory of mind in a child with autism: how to train her? *Psicothema*, 24(4), 542–7. Retrieved from <http://www.ncbi.nlm.nih.gov/pubmed/23079349>
- P135 Mascaro, J. S., Rilling, J. K., Tenzin Negi, L., & Raison, C. L. (2013). Compassion meditation enhances empathic accuracy and related neural activity. *Social Cognitive and Affective Neuroscience*, 8(1), 48–55. <https://doi.org/10.1093/scan/nss095>
- P136 Mason, L., Peters, E. R., Dima, D., Williams, S. C., & Kumari, V. (2016). Cognitive behavioral therapy normalizes functional connectivity for social threat in psychosis. *Schizophrenia Bulletin*, 42(3), 684–692. <https://doi.org/10.1093/schbul/sbv153>
- P137 Matsui, M., Arai, H., Yonezawa, M., Sumiyoshi, T., Suzuki, M., & Kurachi, M. (2009). The effects of cognitive rehabilitation on social knowledge in patients with schizophrenia. *Applied Neuropsychology*, 16(3), 158–164. <https://doi.org/10.1080/09084280903098414>
- P138 Mazza, M., Lucci, G., Pacitti, F., Pino, M. C., Mariano, M., Casacchia, M., & Roncone, R. (2010). Could schizophrenic subjects improve their social cognition abilities only with observation and imitation of social situations? *Neuropsychological Rehabilitation*, 20(5), 675–703. <https://doi.org/10.1080/09602011.2010.486284>
- P139 Melloni, M., Sedeño, L., Couto, B., Reynoso, M., Gelormini, C., Favalaro, R., ... Ibanez, A. (2013). Preliminary evidence about the effects of meditation on interoceptive sensitivity and social cognition. *Behavioral and Brain Functions*, 9(1), 47. <https://doi.org/10.1186/1744-9081-9-47>
- P140 Mendella, P. D., Burton, C. Z., Tasca, G. A., Roy, P., St. Louis, L., & Twamley, E. W. (2015). Compensatory cognitive training for people with first-episode schizophrenia: Results from a pilot randomized controlled trial. *Schizophrenia Research*, 162(1–3), 108–111. <https://doi.org/10.1016/j.schres.2015.01.016>
- P141 Money, C., Genders, R., Treasure, J., Schmidt, U., & Tchanturia, K. (2011). A brief emotion focused intervention for inpatients with anorexia nervosa: A qualitative study. *Journal of Health Psychology*, 16(6), 947–958. <https://doi.org/10.1177/1359105310396395>
- P142 Montag, C., Haase, L., Seidel, D., Bayerl, M., Gallinat, J., Herrmann, U., & Dannecker, K. (2014). A pilot RCT of psychodynamic group art therapy for patients in acute psychotic episodes: Feasibility, impact on symptoms and mentalising capacity. *PLoS ONE*, 9(11), e112348. <https://doi.org/10.1371/journal.pone.0112348>
- P143 Mueller, D. R., Schmidt, S. J., & Roder, V. (2015). One-year randomized controlled trial and follow-up of integrated neurocognitive therapy for schizophrenia outpatients. *Schizophrenia Bulletin*, 41(3), 604–616. <https://doi.org/10.1093/schbul/sbu223>
- P144 Nahum, M., Fisher, M., Loewy, R., Poelke, G., Ventura, J., Nuechterlein, K. H., ... Vinogradov, S. (2014). A novel, online social cognitive training program for young adults with schizophrenia: A pilot study. *Schizophrenia Research: Cognition*, 1(1), e11–e19. <https://doi.org/10.1016/j.scog.2014.01.003>
- P145 Neumann, D., Babbage, D. R., Zupan, B., & Willer, B. (2015). A randomized controlled trial of emotion

- recognition training after traumatic brain injury. *Journal of Head Trauma Rehabilitation*, 30(3), E12–E23. <https://doi.org/10.1097/HTR.0000000000000054>
- P146 Nikmanesh, Z., Kazemi, Y., Raghbi, M., & Rabani Bavejdan, M. (2012). Effectiveness of optimism skills group training: Examination of the attributional styles of boys at the Kerman juvenile correction and rehabilitation center. *International Journal of High Risk Behaviors and Addiction*, 1(2), 61–65. <https://doi.org/10.5812/ijhrba.4412>
- P147 Nowakowski, M. E., Antony, M. M., & Koerner, N. (2015). Modifying interpretation biases: Effects on symptomatology, behavior, and physiological reactivity in social anxiety. *Journal of Behavior Therapy and Experimental Psychiatry*, 49, 44–52. <https://doi.org/10.1016/j.jbtep.2015.04.004>
- P148 Nuechterlein, K. H., Ventura, J., McEwen, S. C., Gretchen-Doorly, D., Vinogradov, S., & Subotnik, K. L. (2016). Enhancing cognitive training through aerobic exercise after a first schizophrenia episode: Theoretical conception and pilot study. *Schizophrenia Bulletin*, 42(suppl 1), S44–S52. <https://doi.org/10.1093/schbul/sbw007>
- P149 O’Kearney, R., Gibson, M., Christensen, H., & Griffiths, K. M. (2006). Effects of a cognitive-behavioural Internet program on depression, vulnerability to depression and stigma in adolescent males: A school-based controlled trial. *Cognitive Behaviour Therapy*, 35(1), 43–54. <https://doi.org/10.1080/16506070500303456>
- P150 Ornaghi, V., Brockmeier, J., & Grazzani, I. (2014). Enhancing social cognition by training children in emotion understanding: A primary school study. *Journal of Experimental Child Psychology*, 119, 26–39. <https://doi.org/10.1016/j.jecp.2013.10.005>
- P151 Ornaghi, V., Grazzani, I., Cherubin, E., Conte, E., & Piralli, F. (2015). ‘Let’s talk about emotions!’: The effect of conversational training on preschoolers’ emotion comprehension and prosocial orientation. *Social Development*, 24(1), 166–183. <https://doi.org/10.1111/sode.12091>
- P152 Ottavi, P., D’Alia, D., Lysaker, P., Kent, J., Popolo, R., Salvatore, G., & Dimaggio, G. (2014). Metacognition-oriented social skills training for individuals with long-term schizophrenia: Methodology and clinical illustration. *Clinical Psychology & Psychotherapy*, 21(5), 465–473. <https://doi.org/10.1002/cpp.1850>
- P153 Parker, S., Foley, S., Walker, P., & Dark, F. (2013). Improving the social cognitive deficits of schizophrenia: a community trial of social cognition and interaction training (SCIT). *Australasian Psychiatry*, 21(4), 346–351. <https://doi.org/10.1177/1039856213486305>
- P154 Parkes, J. F., & Mallett, C. J. (2011). Developing mental toughness: Attributional style retraining in rugby. *The Sport Psychologist*, 25(3), 269–287. <https://doi.org/10.1123/tsp.25.3.269>
- P155 Paynter, J., & Peterson, C. C. (2013). Further evidence of benefits of thought-bubble training for theory of mind development in children with autism spectrum disorders. *Research in Autism Spectrum Disorders*, 7(2), 344–348. <https://doi.org/10.1016/j.rasd.2012.10.001>
- P156 Penton-Voak, I. S., Bate, H., Lewis, G., & Munafo, M. R. (2012). Effects of emotion perception training on mood in undergraduate students: randomised controlled trial. *The British Journal of Psychiatry*, 201(1), 71–72. <https://doi.org/10.1192/bjp.bp.111.107086>
- P157 Peña, J., Ibarretxe-Bilbao, N., Garcia-Gorostiaga, I., Gomez-Beldarrain, M. A., Diez-Cirarda, M., & Ojeda, N. (2014). Improving functional disability and cognition in Parkinson disease: Randomized controlled trial. *Neurology*, 83(23), 2167–2174. <https://doi.org/10.1212/WNL.0000000000001043>
- P158 Peña, J., Ibarretxe-Bilbao, N., Sánchez, P., Iriarte, M. B., Elizagarate, E., Garay, M. A., ... Ojeda, N. (2016). Combining social cognitive treatment, cognitive remediation, and functional skills training in schizophrenia: a randomized controlled trial. *NPJ Schizophrenia*, 2, 16037. <https://doi.org/10.1038/npjzsch.2016.37>
- P159 Peña, J., Sánchez, P., Elizagarate, E., Ibarretxe-Bilbao, N., Ezcurra, J., Caballero, L., ... Ojeda, N. (2015). Clinical (but not cognitive) recovery in schizophrenia through the experience of fictional cinema. *Schizophrenia Research: Cognition*, 2(4), 189–194. <https://doi.org/10.1016/j.scog.2015.10.003>
- P160 Peters, K. D., Constans, J. I., & Mathews, A. (2011). Experimental modification of attribution processes. *Journal of Abnormal Psychology*, 120(1), 168–173. <https://doi.org/10.1037/a0021899>
- P161 Peyroux, E., & Franck, N. (2014). RC2S: A cognitive remediation program to improve social cognition in schizophrenia and related disorders. *Frontiers in Human Neuroscience*, 8. <https://doi.org/10.3389/fnhum.2014.00400>
- P162 Peyroux, E., & Franck, N. (2016). Improving social cognition in people with schizophrenia with RC2S: Two single-case studies. *Frontiers in Psychiatry*, 7. <https://doi.org/10.3389/fpsy.2016.00066>
- P163 Pino, M. C., & Mazza, M. (2016). The use of “literary fiction” to promote mentalizing ability. *PLoS ONE*, 11(8), e0160254. <https://doi.org/10.1371/journal.pone.0160254>
- P164 Pino, M. C., Pettinelli, M., Clementi, D., Gianfelice, C., & Mazza, M. (2015). Improvement in cognitive and affective theory of mind with observation and imitation treatment in subjects with schizophrenia. *Clinical Neuropsychiatry*, 12(3), 64–72.
- P165 Popova, P., Popov, T. G., Wienbruch, C., Carolus, A. M., Miller, G. A., & Rockstroh, B. S. (2014). Changing facial affect recognition in schizophrenia: Effects of training on brain dynamics. *NeuroImage: Clinical*, 6, 156–165. <https://doi.org/10.1016/j.nicl.2014.08.026>
- P166 Proudfoot, J. G., Corr, P. J., Guest, D. E., & Dunn, G. (2009). Cognitive-behavioural training to change



- attributional style improves employee well-being, job satisfaction, productivity, and turnover. *Personality and Individual Differences*, 46(2), 147–153. <https://doi.org/10.1016/j.paid.2008.09.018>
- P167 Punamäki, R.-L., Paavonen, J., Toikka, S., & Solantaus, T. (2013). Effectiveness of preventive family intervention in improving cognitive attributions among children of depressed parents: A randomized study. *Journal of Family Psychology*, 27(4), 683–690. <https://doi.org/10.1037/a0033466>
- P168 Qian, L., Dai, Z., & Zhou, S. (2014). Belief understanding intervention for children with autism. *Chinese Journal of Clinical Psychology*, 3, 457–461.
- P169 Qu, L., Shen, P., Chee, Y. Y., & Chen, L. (2015). Teachers' theory-of-mind coaching and children's executive function predict the training effect of sociodramatic play on children's theory of mind. *Social Development*, 24(4), 716–733. <https://doi.org/10.1111/sode.12116>
- P170 Quiles, C., Verdoux, H., & Prouteau, A. (2014). Assessing metacognition during a cognitive task: Impact of "on-line" metacognitive questions on neuropsychological performances in a non-clinical sample. *Journal of the International Neuropsychological Society*, 20(5), 547–554. <https://doi.org/10.1017/S1355617714000290>
- P171 Radice-Neumann, D., Zupan, B., Tomita, M., & Willer, B. (2009). Training emotional processing in persons with brain injury. *Journal of Head Trauma Rehabilitation*, 24(5), 313–323. <https://doi.org/10.1097/HTR.0b013e3181b09160>
- P172 Rakitzi, S., Georgila, P., Efthimiou, K., & Mueller, D. R. (2016). Efficacy and feasibility of the integrated psychological therapy for outpatients with schizophrenia in Greece: Final results of a RCT. *Psychiatry Research*, 242, 137–143. <https://doi.org/10.1016/j.psychres.2016.05.039>
- P173 Reboreda, A., Gómez, G. J., Lemos, S., Esteban, E., Oncins, J., & Pereyra, L. (2011). Training emotion recognition program in schizophrenia patients. *Rehabilitacion Psicosocial*, 8, 8–14.
- P174 Reina, R., López, V., Jiménez, M., García-Calvo, T., & Hutzler, Y. (2011). Effects of awareness interventions on children's attitudes toward peers with a visual impairment. *International Journal of Rehabilitation Research*, 34(3), 243–248. <https://doi.org/10.1097/MRR.0b013e3283487f49>
- P175 Richard, D. A., More, W., & Joy, S. P. (2015). Recognizing emotions: Testing an intervention for children with autism spectrum disorders. *Art Therapy*, 32(1), 13–19. <https://doi.org/10.1080/07421656.2014.994163>
- P176 Roberts, C. M., Kane, R., Bishop, B., Cross, D., Fenton, J., & Hart, B. (2010). The prevention of anxiety and depression in children from disadvantaged schools. *Behaviour Research and Therapy*, 48(1), 68–73. <https://doi.org/10.1016/j.brat.2009.09.002>
- P177 Roberts, D. L., Combs, D. R., Willoughby, M., Mintz, J., Gibson, C., Rupp, B., & Penn, D. L. (2014). A randomized, controlled trial of social cognition and interaction training (SCIT) for outpatients with schizophrenia spectrum disorders. *British Journal of Clinical Psychology*, 53(3), 281–298. <https://doi.org/10.1111/bjc.12044>
- P178 Roberts, D. L., Kleinlein, P., & Stevens, B. (2012). An alternative to generating alternative interpretations in social cognitive therapy for psychosis. *Behavioural and Cognitive Psychotherapy*, 40(4), 491–495. <https://doi.org/10.1017/S1352465812000082>
- P179 Roberts, D. L., & Penn, D. L. (2009). Social cognition and interaction training (SCIT) for outpatients with schizophrenia: A preliminary study. *Psychiatry Research*, 166(2–3), 141–147. <https://doi.org/10.1016/j.psychres.2008.02.007>
- P180 Roberts, D. L., Penn, D. L., Labate, D., Margolis, S. A., & Sterne, A. (2010). Transportability and feasibility of social cognition and interaction training (SCIT) in community settings. *Behavioural and Cognitive Psychotherapy*, 38(1), 35. <https://doi.org/10.1017/S1352465809990464>
- P181 Rocha, N. B. F., & Queirós, C. (2013). Metacognitive and social cognition training (MSCT) in schizophrenia: A preliminary efficacy study. *Schizophrenia Research*, 150(1), 64–68. <https://doi.org/10.1016/j.schres.2013.07.057>
- P182 Rocha, N. B. F., Queirós, C. L., Bravo, A. R., Silva, A. S. A., Marques, A. P. S., Oliveira, C., ... Pereira, N. G. F. (2013). Análise qualitativa do impacto do programa de treino metacognitivo e da cognição social em pessoas com Esquizofrenia. *Estudos de Psicologia (Natal)*, 18(4), 559–568. <https://doi.org/10.1590/S1413-294X2013000400003>
- P183 Rodgers, J. D., Thomeer, M. L., Lopata, C., Volker, M. A., Lee, G. K., McDonald, C. A., ... Biscotto, A. A. (2015). RCT of a psychosocial treatment for children with high-functioning ASD: Supplemental analyses of treatment effects on facial emotion encoding. *Journal of Developmental and Physical Disabilities*, 27(2), 207–221. <https://doi.org/10.1007/s10882-014-9409-x>
- P184 Rooney, R., Hassan, S., Kane, R., Roberts, C. M., & Nesa, M. (2013). Reducing depression in 9–10 year old children in low SES schools: A longitudinal universal randomized controlled trial. *Behaviour Research and Therapy*, 51(12), 845–854. <https://doi.org/10.1016/j.brat.2013.09.005>
- P185 Rose, A., Vinogradov, S., Fisher, M., Green, M. F., Ventura, J., Hooker, C., ... Nahum, M. (2015). Randomized controlled trial of computer-based treatment of social cognition in schizophrenia: the TRuSST trial protocol. *BMC Psychiatry*, 15(1), 142. <https://doi.org/10.1186/s12888-015-0510-1>
- P186 Rosi, A., Cavallini, E., Bottiroli, S., Bianco, F., & Lecce, S. (2016). Promoting theory of mind in older adults:

- does age play a role? *Aging & Mental Health*, 20(1), 22–28. <https://doi.org/10.1080/13607863.2015.1049118>
- P187 Rostan, C., Sidera, F., Serrano, J., Amadó, A., Vallès-Majoral, E., Esteban, M., & Serrat, E. (2014). Fostering theory of mind development. Short- and medium-term effects of training false belief understanding. *Infancia Y Aprendizaje*, 37(3), 498–529. <https://doi.org/10.1080/02103702.2014.965464>
- P188 Russell, T. A., Chu, E., & Phillips, M. L. (2006). A pilot study to investigate the effectiveness of emotion recognition remediation in schizophrenia using the micro-expression training tool. *British Journal of Clinical Psychology*, 45(4), 579–583. <https://doi.org/10.1348/014466505X90866>
- P189 Russell, T. A., Green, M. J., Simpson, I., & Coltheart, M. (2008). Remediation of facial emotion perception in schizophrenia: Concomitant changes in visual attention. *Schizophrenia Research*, 103(1–3), 248–256. <https://doi.org/10.1016/j.schres.2008.04.033>
- P190 Russo-Ponsaran, N. M., Evans-Smith, B., Johnson, J., Russo, J., & McKown, C. (2016). Efficacy of a facial emotion training program for children and adolescents with autism spectrum disorders. *Journal of Nonverbal Behavior*, 40(1), 13–38. <https://doi.org/10.1007/s10919-015-0217-5>
- P191 Sachs, G., Winklbaaur, B., Jagsch, R., Lasser, I., Kryspin-Exner, I., Frommann, N., & Wölwer, W. (2012). Training of affect recognition (TAR) in schizophrenia - Impact on functional outcome. *Schizophrenia Research*, 138(2–3), 262–267. <https://doi.org/10.1016/j.schres.2012.03.005>
- P192 Sacks, S., Fisher, M., Garrett, C., Alexander, P., Holland, C., Rose, D., ... Vinogradov, S. (2013). Combining computerized social cognitive training with neuroplasticity-based auditory training in schizophrenia. *Clinical Schizophrenia & Related Psychoses*, 7(2), 78–86A. <https://doi.org/10.3371/CSRP.SAFL012513>
- P193 Salgueiro, E., Nunes, L., Barros, A., Maroco, J., Salgueiro, A., & dos Santos, M. E. (2012). Effects of a dolphin interaction program on children with autism spectrum disorders – an exploratory research. *BMC Research Notes*, 5(1), 199. <https://doi.org/10.1186/1756-0500-5-199>
- P194 Sanefuji, W., & Ohgami, H. (2013). “Being-imitated” strategy at home-based intervention for young children with autism. *Infant Mental Health Journal*, 34(1), 72–79. <https://doi.org/10.1002/imhj.21375>
- P195 Santiesteban, I., White, S., Cook, J., Gilbert, S. J., Heyes, C., & Bird, G. (2012). Training social cognition: From imitation to theory of mind. *Cognition*, 122(2), 228–235. <https://doi.org/10.1016/j.cognition.2011.11.004>
- P196 Schönenberg, M., Christian, S., Gaußer, A.-K., Mayer, S. V., Hautzinger, M., & Jusyte, A. (2014). Addressing perceptual insensitivity to facial affect in violent offenders: first evidence for the efficacy of a novel implicit training approach. *Psychological Medicine*, 44(5), 1043–1052. <https://doi.org/10.1017/S0033291713001517>
- P197 Serrat Sellabona, E., Serrano Ortiz, J., Amadó Codony, A., Sidera Caballero, F., Andrés Roqueta, C., Lloveras, S., & Badia, I. (2012). Entrenar la comprensión de la falsa creencia en niños con alteraciones del lenguaje. *Revista de Logopedia, Foniatría Y Audiología*, 32(3), 109–119. <https://doi.org/10.1016/j.rlfa.2012.01.003>
- P198 Serret, S., Hun, S., Iakimova, G., Lozada, J., Anastassova, M., Santos, A., ... Askenazy, F. (2014). Facing the challenge of teaching emotions to individuals with low- and high-functioning autism using a new serious game: A pilot study. *Molecular Autism*, 5(1), 37. <https://doi.org/10.1186/2040-2392-5-37>
- P199 Shashi, V., Harrell, W., Eack, S., Sanders, C., McConkie-Rosell, A., Keshavan, M. S., ... Hooper, S. R. (2015). Social cognitive training in adolescents with chromosome 22q11.2 deletion syndrome: feasibility and preliminary effects of the intervention. *Journal of Intellectual Disability Research*, 59(10), 902–913. <https://doi.org/10.1111/jir.12192>
- P200 Soleymani, M., Mohammad, K. P., & Doulatshari, B. (2008). Effectiveness of brief group interpersonal psychotherapy in reducing university students’ depressive symptoms and its effect on attributional style and dysfunctional attitudes. *Psychological Research*, 11(1–2), 41–65.
- P201 Soorya, L. V., Siper, P. M., Beck, T., Soffes, S., Halpern, D., Gorenstein, M., ... Wang, A. T. (2015). Randomized comparative trial of a social cognitive skills group for children with autism spectrum disorder. *Journal of the American Academy of Child & Adolescent Psychiatry*, 54(3), 208–216.e1. <https://doi.org/10.1016/j.jaac.2014.12.005>
- P202 Souto, T., Baptista, A., Tavares, D., Queirós, C., & Marques, A. (2013). Facial emotional recognition in schizophrenia: Preliminary results of the virtual reality program for facial emotional recognition. *Revista de Psiquiatria Clínica*, 40(4), 129–134. <https://doi.org/10.1590/S0101-60832013000400001>
- P203 Sportel, B. E., de Hullu, E., de Jong, P. J., & Nauta, M. H. (2013). Cognitive bias modification versus CBT in reducing adolescent social anxiety: A randomized controlled trial. *PLoS ONE*, 8(5), e64355. <https://doi.org/10.1371/journal.pone.0064355>
- P204 Stroth, S., Kamp, D., Drusch, K., Frommann, N., & Wölwer, W. (2015). Training of affect recognition impacts electrophysiological correlates of facial affect recognition in schizophrenia: Analyses of fixation-locked potentials. *The World Journal of Biological Psychiatry*, 16(6), 411–421. <https://doi.org/10.3109/15622975.2015.1051110>
- P205 Stueck, M., Villegas, A., Lahn, F., Bauer, K., Tofts, P., & Sack, U. (2016). Biodanza for kindergarten children (TANZPRO-Biodanza): reporting on changes of cortisol levels and emotion recognition. *Body, Movement and Dance in Psychotherapy*, 11(1), 75–89. <https://doi.org/10.1080/17432979.2015.1124923>
- P206 Taksal, A., Sudhir, P. M., Janakiprasad, K. K., Viswanath, D., & Thirthalli, J. (2016). Impact of the integrated psychological treatment (IPT) on social cognition, social skills and functioning in persons diagnosed with

- schizophrenia: A feasibility study from India. *Psychosis*, 8(3), 214–225. <https://doi.org/10.1080/17522439.2015.1088058>
- P207 Tan, L. B. G., Lo, B. C. Y., & Macrae, C. N. (2014). Brief mindfulness meditation improves mental state attribution and empathizing. *PLoS ONE*, 9(10), e110510. <https://doi.org/10.1371/journal.pone.0110510>
- P208 Tardif, C., Lainé, F., Rodriguez, M., & Gepner, B. (2007). Slowing down presentation of facial movements and vocal sounds enhances facial expression recognition and induces facial–vocal imitation in children with autism. *Journal of Autism and Developmental Disorders*, 37(8), 1469–1484. <https://doi.org/10.1007/s10803-006-0223-x>
- P209 Tas, C., Danaci, A. E., Cubukcuoglu, Z., & Brüne, M. (2012). Impact of family involvement on social cognition training in clinically stable outpatients with schizophrenia - A randomized pilot study. *Psychiatry Research*, 195(1–2), 32–38. <https://doi.org/10.1016/j.psychres.2011.07.031>
- P210 Taumoepeau, M., & Reese, E. (2013). Maternal reminiscing, elaborative talk, and children’s theory of mind: An intervention study. *First Language*, 33(4), 388–410. <https://doi.org/10.1177/0142723713493347>
- P211 Taylor, R., Cella, M., Csipke, E., Heriot-Maitland, C., Gibbs, C., & Wykes, T. (2016). Tackling social cognition in schizophrenia: A randomized feasibility trial. *Behavioural and Cognitive Psychotherapy*, 44(3), 306–317. <https://doi.org/10.1017/S1352465815000284>
- P212 Tchanturia, K., Doris, E., Mountford, V., & Fleming, C. (2015). Cognitive remediation and emotion skills training (CREST) for anorexia nervosa in individual format: self-reported outcomes. *BMC Psychiatry*, 15(1), 53. <https://doi.org/10.1186/s12888-015-0434-9>
- P213 Thomeer, M. L., Lopata, C., Donnelly, J. P., Booth, A., Shanahan, A., Federiconi, V., ... Rodgers, J. D. (2016). Community effectiveness RCT of a comprehensive psychosocial treatment for high-functioning children with ASD. *Journal of Clinical Child & Adolescent Psychology*, 1–12. <https://doi.org/10.1080/15374416.2016.1247359>
- P214 Thomeer, M. L., Lopata, C., Volker, M. A., Toomey, J. A., Lee, G. K., Smerbeck, A. M., ... Smith, R. A. (2012). Randomized clinical trial replication of a psychosocial treatment for children with high-functioning autism spectrum disorders. *Psychology in the Schools*, 49(10), 942–954. <https://doi.org/10.1002/pits.21647>
- P215 Thomeer, M. L., Rodgers, J. D., Lopata, C., McDonald, C. A., Volker, M. A., Toomey, J. A., ... Gullo, G. (2011). Open-trial pilot of mind reading and in vivo rehearsal for children with HFASD. *Focus on Autism and Other Developmental Disabilities*, 26(3), 153–161. <https://doi.org/10.1177/1088357611414876>
- P216 Thomeer, M. L., Smith, R. A., Lopata, C., Volker, M. A., Lipinski, A. M., Rodgers, J. D., ... Lee, G. K. (2015). Randomized controlled trial of mind reading and in vivo rehearsal for high-functioning children with ASD. *Journal of Autism and Developmental Disorders*, 45(7), 2115–2127. <https://doi.org/10.1007/s10803-015-2374-0>
- P217 Tompkins, V. (2015). Improving low-income preschoolers’ theory of mind: A training study. *Cognitive Development*, 36, 1–19. <https://doi.org/10.1016/j.cogdev.2015.07.001>
- P218 Tucci, S. L., Easterbrooks, S. R., & Lederberg, A. R. (2016). The effects of theory of mind training on the false belief understanding of deaf and hard-of-hearing students in prekindergarten and kindergarten. *Journal of Deaf Studies and Deaf Education*, 21(3), 310–325. <https://doi.org/10.1093/deafed/enw031>
- P219 Turner-Brown, L. M., Perry, T. D., Dichter, G. S., Bodfish, J. W., & Penn, D. L. (2008). Brief report: Feasibility of social cognition and interaction training for adults with high functioning autism. *Journal of Autism and Developmental Disorders*, 38(9), 1777–1784. <https://doi.org/10.1007/s10803-008-0545-y>
- P220 Ussorio, D., Giusti, L., Wittekind, C. E., Bianchini, V., Malavolta, M., Pollice, R., ... Roncone, R. (2016). Metacognitive training for young subjects (MCT young version) in the early stages of psychosis: Is the duration of untreated psychosis a limiting factor? *Psychology and Psychotherapy: Theory, Research and Practice*, 89(1), 50–65. <https://doi.org/10.1111/papt.12059>
- P221 Valle, A., Massaro, D., Castelli, I., Sanguiliano Intra, F., Lombardi, E., Bracaglia, E., & Marchetti, A. (2016). Promoting mentalizing in pupils by acting on teachers: Preliminary Italian evidence of the “Thought in Mind” project. *Frontiers in Psychology*, 7. <https://doi.org/10.3389/fpsyg.2016.01213>
- P222 Vassilopoulos, S. P., Brouzos, A., & Andreou, E. (2015). A multi-session attribution modification program for children with aggressive behaviour: Changes in attributions, emotional reaction estimates, and self-reported aggression. *Behavioural and Cognitive Psychotherapy*, 43(5), 538–548. <https://doi.org/10.1017/S1352465814000149>
- P223 Vassilopoulos, S. P., Brouzos, A., Damer, D. E., Mellou, A., & Mitropoulou, A. (2013). A psychoeducational school-based group intervention for socially anxious children. *The Journal for Specialists in Group Work*, 38(4), 307–329. <https://doi.org/10.1080/01933922.2013.819953>
- P224 Vassilopoulos, S. P., Moberly, N. J., & Zisimatou, G. (2013). Experimentally modifying interpretations for positive and negative social scenarios in children: A preliminary investigation. *Behavioural and Cognitive Psychotherapy*, 41(1), 103–116. <https://doi.org/10.1017/S1352465812000537>
- P225 Vázquez-Campo, M., Maroño, Y., Lahera, G., Mateos, R., & García-Caballero, A. (2016). e-Motional Training®: Pilot study on a novel online training program on social cognition for patients with schizophrenia. *Schizophrenia Research: Cognition*, 4, 10–17. <https://doi.org/10.1016/j.scog.2015.11.007>

- P226 Velligan, D. I., Roberts, D., Mintz, J., Maples, N., Li, X., Medellin, E., & Brown, M. (2015). A randomized pilot study of MOtiVation and Enhancement (MOVE) Training for negative symptoms in schizophrenia. *Schizophrenia Research*, *165*(2–3), 175–180. <https://doi.org/10.1016/j.schres.2015.04.008>
- P227 Veltro, F., Mazza, M., Vendittelli, N., Alberti, M., Casacchia, M., & Roncone, R. (2011). A comparison of the effectiveness of problem solving training and of cognitive-emotional rehabilitation on neurocognition, social cognition and social functioning in people with schizophrenia. *Clinical Practice & Epidemiology in Mental Health*, *7*(1), 123–132. <https://doi.org/10.2174/1745017901107010123>
- P228 Voutilainen, G., Kouhia, T., Roberts, D. L., & Oksanen, J. (2016). Social cognition and interaction training (SCIT) for adults with psychotic disorders: A feasibility study in Finland. *Behavioural and Cognitive Psychotherapy*, *44*(6), 711–716. <https://doi.org/10.1017/S1352465816000151>
- P229 Wain, H., Kneebone, I. I., & Cropley, M. (2011). Attributional intervention for depression in two people with multiple sclerosis (MS): Single case design. *Behavioural and Cognitive Psychotherapy*, *39*(1), 115–121. <https://doi.org/10.1017/S1352465810000536>
- P230 Wang, Y., Roberts, D. L., Xu, B., Cao, R., Yan, M., & Jiang, Q. (2013). Social cognition and interaction training for patients with stable schizophrenia in Chinese community settings. *Psychiatry Research*, *210*(3), 751–755. <https://doi.org/10.1016/j.psychres.2013.08.038>
- P231 Ware, A., Wilson, C., Tapp, J., & Moore, E. (2016). Mentalisation-based therapy (MBT) in a high-secure hospital setting: expert by experience feedback on participation. *The Journal of Forensic Psychiatry & Psychology*, *27*(5), 722–744. <https://doi.org/10.1080/14789949.2016.1174725>
- P232 Warrender, D. (2015). Staff nurse perceptions of the impact of mentalization-based therapy skills training when working with borderline personality disorder in acute mental health: a qualitative study. *Journal of Psychiatric and Mental Health Nursing*, *22*(8), 623–633. <https://doi.org/10.1111/jpm.12248>
- P233 Weinger, P. M., & Depue, R. A. (2011). Remediation of deficits in recognition of facial emotions in children with autism spectrum disorders. *Child & Family Behavior Therapy*, *33*(1), 20–31. <https://doi.org/10.1080/07317107.2011.545008>
- P234 Wellman, H. M., & Peterson, C. C. (2013). Deafness, thought bubbles, and theory-of-mind development. *Developmental Psychology*, *49*(12), 2357–2367. <https://doi.org/10.1037/a0032419>
- P235 Williams, B. T., Gray, K. M., & Tonge, B. J. (2012). Teaching emotion recognition skills to young children with autism: a randomised controlled trial of an emotion training programme. *Journal of Child Psychology and Psychiatry*, *53*(12), 1268–1276. <https://doi.org/10.1111/j.1469-7610.2012.02593.x>
- P236 Williamson, J., & Isaki, E. (2015). Facial affect recognition training through telepractice: Two case studies of individuals with chronic traumatic brain injury. *International Journal of Telerehabilitation*, *7*(1), 13–20. <https://doi.org/10.5195/IJT.2015.6167>
- P237 Wölwer, W., & Frommann, N. (2008). Therapy of social-cognitive impairments - Training of affect recognition as functional specific approach. *Nervenheilkunde*, *27*(11), 1032–1038.
- P238 Wölwer, W., & Frommann, N. (2011). Social-cognitive remediation in schizophrenia: Generalization of effects of the training of affect recognition (TAR). *Schizophrenia Bulletin*, *37*(suppl 2), S63–S70. <https://doi.org/10.1093/schbul/sbr071>
- P239 Xiao, X., Yang, N., Qian, L., & Zhou, S. (2014). Pretend playing training improves theory of mind in children with autism. *Chinese Journal of Clinical Psychology*, *22*(4), 742–745.
- P240 Zhang, D.-K., Xu, S.-Q., Su, Q.-R., Pan, Y.-N., Shen, X.-Y., Chen, S.-M., ... Shan, X.-Y. (2012). Effects of cognitive and skilled rehabilitative training on deficiencies of theory of mind in patients with traumatic brain injury: A 12-week random, single-blind clinical trial. *Chinese Mental Health Journal*, *12*, 906–912.
- P241 Zimmer, M., Duncan, A. V., Laitano, D., Ferreira, E. E., & Belmonte-de-Abreu, P. (2007). A twelve-week randomized controlled study of the cognitive-behavioral Integrated Psychological Therapy program: positive effect on the social functioning of schizophrenic patients. *Revista Brasileira de Psiquiatria*, *29*(2), 140–7. Retrieved from <http://www.ncbi.nlm.nih.gov/pubmed/17650536>
